# Supplementary material
Source: publisher figshare collection journal article supplement (https://karger.figshare.com/ndownloader/files/17400575)
Supplement: Supplementary file 1 [file 17400575]

## Sheet: Blad1
Appendix 3: Summary of the results on different indices for RDS severity as possible predictors for INSURE failure
Predictive factor	Study	Univariate analysis				Multivariate analysis
			INSURE SUCCESS group	INSURE FAILURE group	p-value	Variable	Measure of association (95% CI)
pCO2 (mmHg)	Ancora, 2010		52.1 ± 8.7	51.6 ± 12.0	0.861
	Brix, 2014					pCO2 >7 kPa (52 mmHg)	aOR 2.0 (0.7 - 5.8)
	Cherif, 2008		41.4 ± 3.2	55.4 ± 3.4	<0.001	pCO2 >50 mmHg	aOR 1.82 (1.76 - 90.56)
	Dani, 2010		37.2 ± 5.1	50.0 ± 10.3	0.002
	Gharehbaghi, 2014		41.9 ± 10.4	46.6 ± 17.4	0.001
	Li, 2014		49 ± 11	57 ± 10	0.002	pCO2 >54 mmHg	aOR 9.36 (1.96 - 44.74)
		No. of patients with pCO2 >54 mmHg	12/42 (29)	18/29 (62)	0.005
	Talosi, 2014		46.1 ± 10.4	46.9 ± 10.2	0.769
pO2 (mmHg)	Brix, 2014					pO2 <7.5 kPa (56 mmHg)	aOR 0.8 (0.2 - 2.9)
	Cherif, 2008		62.4 ± 3.1	58.4 ± 3.3	NS
	Dani, 2010		52.8 ± 17.7	62.7 ± 23.4	0.176
	Gharehbaghi, 2014		52.6 ± 14.9	48.7 ± 13.2	0.14
	Li, 2014		70 ± 16	58 ± 19	0.006
		No. of patients with pO2 <65 mmHg	15/42 (36)	19/29 (66)	0.013
	Talosi, 2014		54.0 ± 16.1	47.7 ± 10.6	0.097
a/A-ratio†	Brix, 2014					a/ApO2 <0.20	aOR 0.6 (0.20 - 1.8)
	Cherif, 2008		0.24 ± 0.03	0.16 ± 0.05	0.04	a/ApO2 <0.18	aOR 1.13 (1.06 - 85.34)
	Dani, 2010		0.48 ± 0.18	0.22 ± 0.12	<0.0001	a/ApO2 <0.44	aRR 2.01 (1.33 - 3.03)
	Li, 2014		0.45 ± 0.14	0.34 ± 0.12	0.001
		No. of patients with a/ApO2 <0.40	15/42 (36)	22/29 (76)	0.001
	Tagare, 2014	Median (95% CI)	0.31 (0.26 - 0.36)	0.33 (0.25 - 0.39)	0.909	a/ApO2 <0.3	aOR 1.3 (0.6 - 1.6)
paO2/FiO2	Dani, 2010		241 ± 72	135 ± 72	<0.0001	pO2/FiO2 <218	aRR 1.88 (1.26 - 2.80)
	Li, 2014		226 ± 65	158 ± 57	<0.001
		No. of patients with pO2/FiO2 <195	12/42 (29)	24/29 (83)	<0.001	pO2/FiO2 <195	aOR 6.57 (1.03 - 42.00)
Oxygenation index‡	Tooley, 2003	Median (range)	4.7 (2.6 - 10.9)	11.2 (7.3 - 28.3)	0.0001
FiO2	Ancora, 2010		0.46 ± 0.20	0.41 ± 0.13	0.334
	Azzabi, 2016		0.60 ± 0.20	0.90 ± 0.20	<0.001	Not clearly reported	aOR 7.9 (1.07 - 60)
	Brix, 2014					FiO2 >0.50	aOR 1.3 (0.5 - 3.6)
	Dani, 2010		0.30 ± 0.10	0.46 ± 0.10	<0.0001
	Gharehbaghi, 2014		0.40 ± 0.11	0.53 ± 0.19	<0.001
	Ognean, 2016		0.69 ± 0.28	0.70 ± 0.30	0.871
RDS score	Danaei, 2017	RDS score (no reference) No. of patients with: - mild RDS - moderate RDS - severe RDS	30/113 (26) 81/113 (71) 2/113 (2)	8/79 (10) 67/79 (85) 4/79 (5)	0.011	"Severity of RDS" (not clearly defined)	aOR 6.31 (2.07 - 19.90)
	Gharehbaghi, 2014	RDS score (no reference)	7.1 ± 1.3	8.8 ± 1.0	<0.001
	Morales-Barquet, 2018	Silverman-Andersen score (median + range)	2 (0 - 4)	3 (0 - 6)	0.03
	Tagare, 2014	Silverman-Andersen score	5.9 ± 0.45	5.6 ± 0.4	0.324	SA score <5	aOR 1.3 (0.7 - 1.6)
Radiological RDS grading (Kero et al. Eur J Pediatr 1979)	Azzabi, 2016	No. of patients with severe RDS	9/27 (33)	11/13 (85)	0.003	Severe RDS	aOR 1.06 (1.01 - 1.11)
	Cherif, 2008	No. of patients with severe RDS	30/74 (40)	23/35 (66)	0.01	Severe RDS	aOR 1.31 (1.15-70.16)
	Gharehbaghi, 2014	No. of patients with severe RDS	20/102 (20)	29/45 (64)	<0.001
Values in univariate analyses represent either mean ± standard deviation or number (%) unless otherwise noted.
Abbreviations: 95% CI: 95% confidence interval; pCO2: partial pressure of carbon dioxide; aOR: adjusted odds ratio; No.: number; pO2: partial pressure of oxygen; NS: not significant; a/A-ratio: arterial to alveolar oxygen tension ratio; paO2/FiO2: partial pressure arterial oxygen to fraction of inspired oxygen ratio; aRR: adjusted relative risk; FiO2: fraction of inspired oxygen; RDS: respiratory…
Typography: † Arterial to alveolar oxygen tension ratio = PO2 (kPa) / (FiO2 x 95 - PCO2 (kPa)); ‡ Oxygenation index = FiO2 (%) x mean airway pressure (mmHg) / PO2 (mmHg).
